# Supplementary material for: Early Cold Stored Platelet Transfusion Following Severe Injury: A Randomized Clinical Trial
Source: PubMed Central journal article supplement — Ann Surg. 2024 May 6;280(2):212–21. doi: 10.1097/SLA.0000000000006317 (PMC11224567; doi:10.1097/sla.0000000000006317), 2024-05-06

**Figure 1.** Flow Diagram Showing Participant Inclusion and Exclusion from Initial Screening to Final Study Population

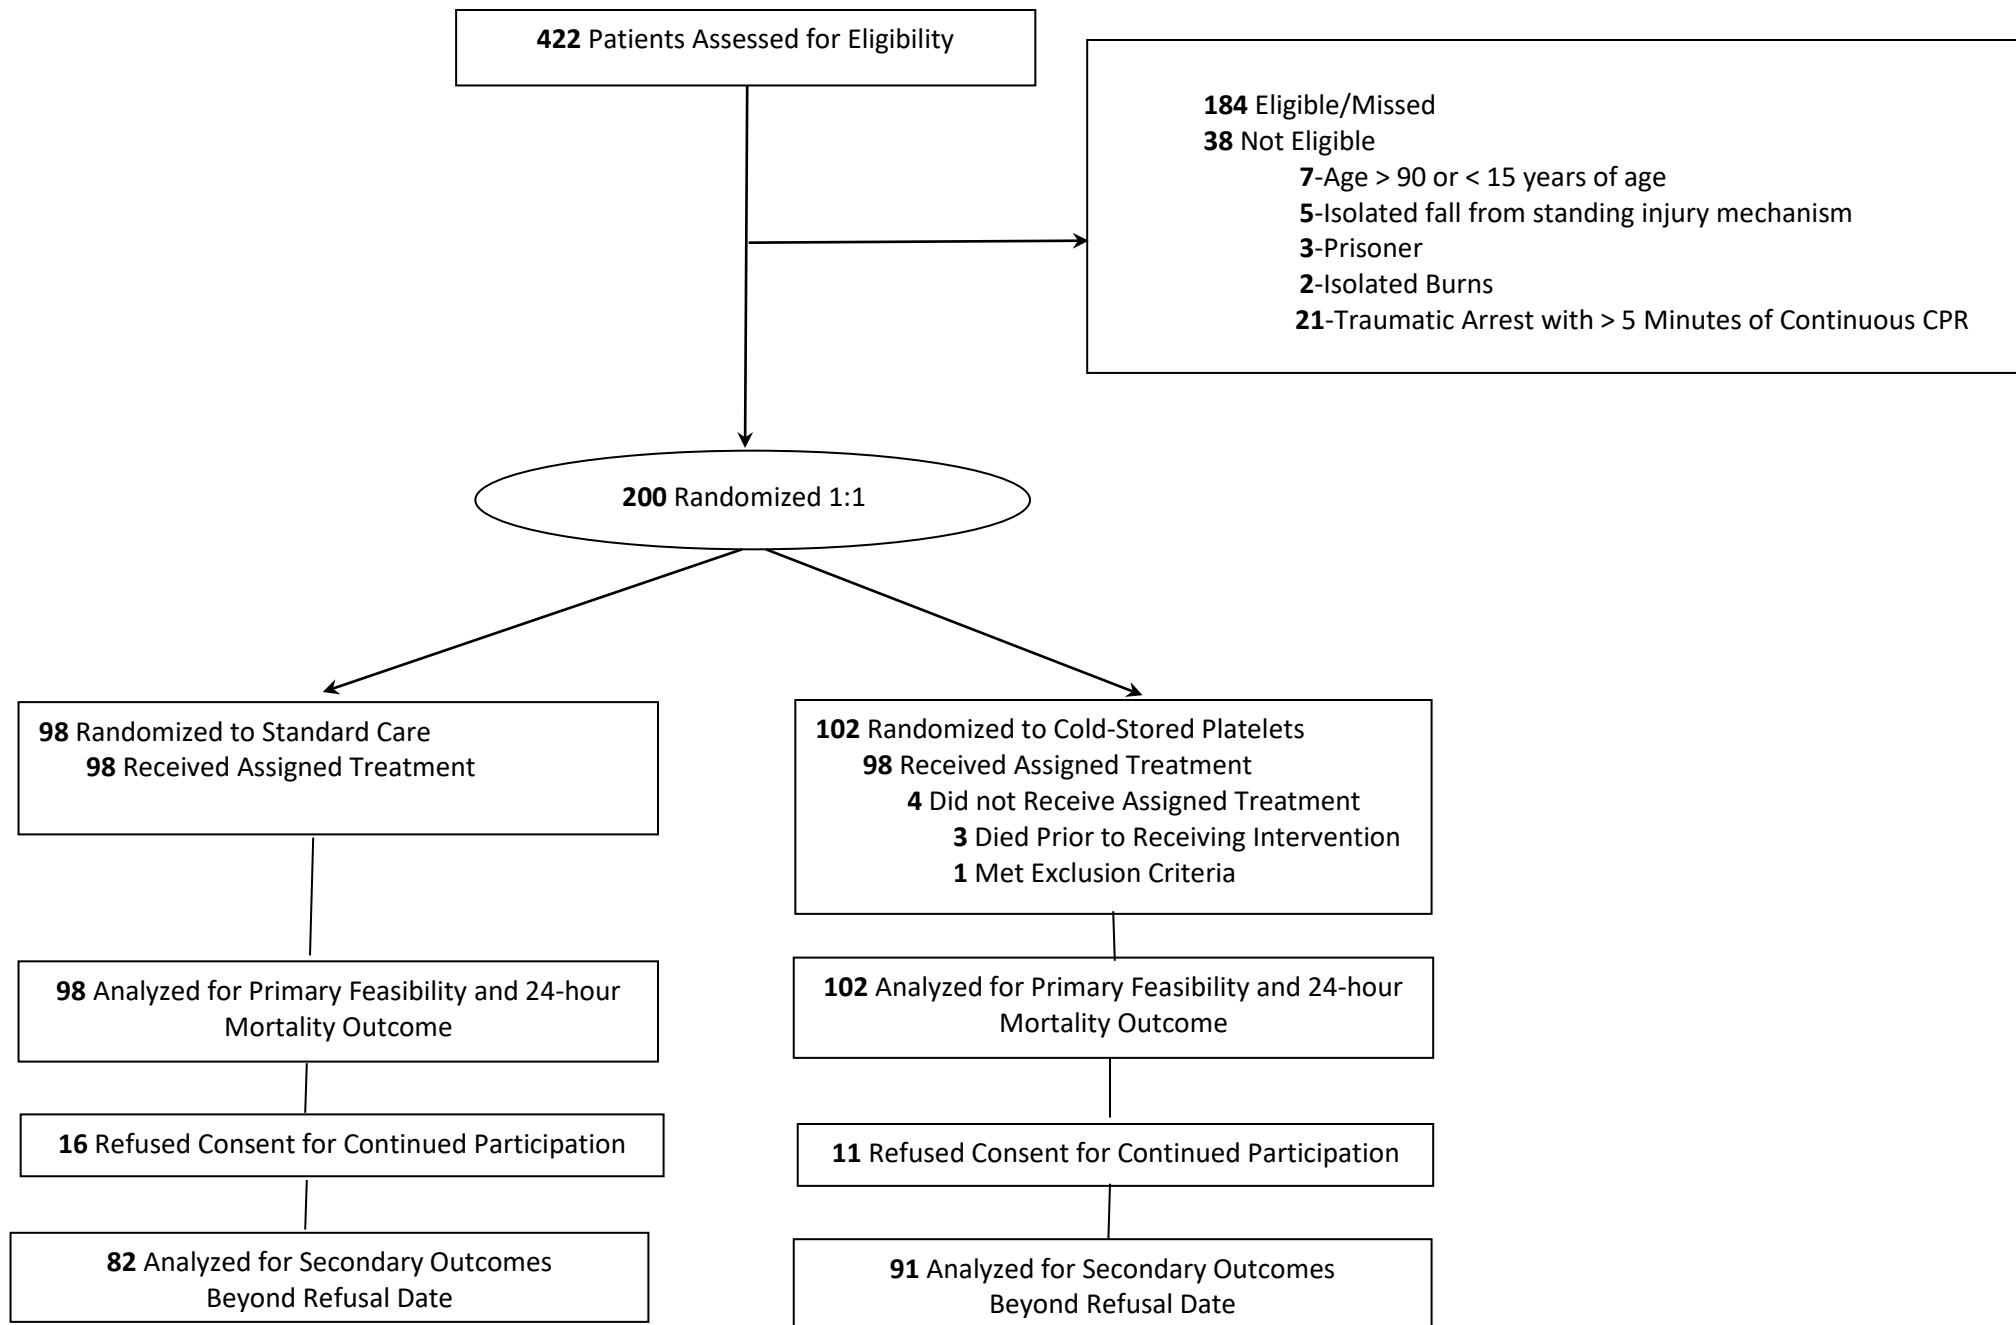

Supplement: sla-280-212-s003.pdf [file sla-280-212-s003.pdf]
